# Supplementary material for: Do not stop me now: A feasibility study for a personalized, phased psychomotor sports intervention to promote social integration in people with early psychosis.
Source: Research Square preprint supplement (doi:10.21203/rs.3.rs-7992569/v1), 2025-11-06
Supplement: Supplementary file 1 [file 238096c4d3d952657d32634b.docx]

| **Supplementary Information**  **Do not stop me now: A feasibility study for a personalized, phased psychomotor sports intervention to promote social integration in people with early psychosis**     | **Supplementary Table 1.** | | | | | | | --- | --- | --- | --- | --- | --- | | *Psychomotor Therapy Toolbox with summery per exercises per parameter* | | | | | | | Parameter | Subgoals and exercises | | | | | | Negative symptoms | Increasing strength, flexibility, coordination and stamina | Enhancing breathing techniques and concentration | Increasing relaxation and body awareness |  |  | | Social functioning | Learning to cope with the boundaries of oneself and the other | Recognizing and understanding non-verbal behavior | Increasing insight in one’s own interaction patterns | Increasing social skills | Learning different types of social behaviors in diverse contexts | | Self-stigma | Gaining insight into the degree of self-stigma | Bending the self-stigma towards positive attitudes | Increasing resilience towards public stigma |  |  | | Self esteem | Getting to know your own physical capabilities | Strengthening self-respect and self-esteem | Looking at yourself and your body in a realistic way | Increasing insight into what you can cause and influence yourself | Practicing assertiveness, coping and problem-solving strategies | | Physical activity | Exploring methods of increasing physical activity | Establishing a baseline level of activity and fitness, with the aim of increasing it | Designing and following an activity schedule per week |  |  | |
| --- | --- | --- | --- | --- | --- | --- | --- | --- | --- | --- | --- | --- | --- | --- | --- | --- | --- | --- | --- | --- | --- | --- | --- | --- | --- | --- | --- | --- | --- | --- | --- | --- | --- | --- | --- | --- | --- | --- | --- | --- | --- | --- | --- | --- | --- | --- | --- | --- |

| **Supplementary Information**    **Supplementary Tabel 2.**  *PEM and Tau-U Analysis Results per Parameter* | | | | | | | | |
| --- | --- | --- | --- | --- | --- | --- | --- | --- |
| PEM Analysis | | | Tau-U Analysis | | | | | |
| Participant 1 | | |  |  |  |  |  |  |
| Parameter | Median | PEM | S | PAIRS | TAU | SDtau | P Value | CI 85% |
| Symptoms | 69.40 | 0% | -299 | 645 | -0.4636 | 0.1746 | 0.0079 | -0.715, -0.212 |
| Social inclusion | 53.08 | 21.43% | -175 | 645 | -0.2713 | 0.1746 | 0.1202 | -0.523, -0.020 |
| (Self)Stigma | 46.84 | 35.71% | 28 | 645 | 0.0434 | 0.1746 | 0.8037 | -0.208, 0.295 |
| Self-esteem | 58.42 | 57.14% | -113 | 645 | -0.1752 | 0.1746 | 0.3157 | -0.427, 0.076 |
| Personal goal | 50.18 | 66.67% | -64 | 570 | -0.1123 | 0.1777 | 0.5275 | -0.368, 0.144 |
| Sedentary behavior (hours) | 2.15 | 92.86% |  |  |  |  |  |  |
| Participant 2 | | |  |  |  |  |  |  |
| Parameter | Median | PEM | S | PAIRS | TAU | SDtau | P Value | CI 85% |
| Symptoms | 44.29 | 95.24% | 466 | 1846 | 0.2524 | 0.133 | 0.0577 | 0.061, 0.444 |
| Social inclusion | 50.71 | 23.81% | -586 | 1846 | -0.3174 | 0.133 | 0.017 | -0.509, -0.126 |
| (Self)Stigma | 49.66 | 90.48% | 465 | 1846 | 0.2519 | 0.133 | 0.0583 | 0.060, 0.443 |
| Self-esteem | 42.77 | 90.48% | 484 | 1846 | 0.2622 | 0.133 | 0.0487 | 0.071, 0.454 |
| Sedentary behavior (hours) | 5 | 33.33% |  |  |  |  |  |  |
| Participant 3# | | |  |  |  |  |  |  |
| Parameter | Median | PEM | S | PAIRS | TAU | SDtau | P Value | CI 85% |
| Symptoms | 85 | 83.33% | 8 | 528 | 0.0152 | 0.1723 | 0.9299 | -0.233, 0.263 |
| Social inclusion | 72 | 100% | 336 | 528 | 0.6364 | 0.1723 | 0.0002 | 0.388, 0.884 |
| (Self)Stigma | 98 | 33.33% | -69 | 528 | -0.1307 | 0.1723 | 0.4481 | -0.379, 0.117 |
| Self-esteem | 78 | 83.33% | 22 | 528 | 0.0417 | 0.1723 | 0.8089 | -0.206, 0.290 |
| Personal goal | 50 | 66.66% | -248 | 528 | -0.4697 | 0.1723 | 0.0064 | -0.718, -0.222 |

# For participants 3 there is only one data point in phase 3, preventing accurate PEM score calculations comparing baseline and phase 3; PEM scores presented are calculated over baseline and phase 2.
